# Supplementary material for: The intronic BRCA1 c.5407-25T>A variant causing partly skipping of exon 23—a likely pathogenic variant with reduced penetrance?
Source: PubMed Central journal article supplement (PMC7382492; doi:10.1038/s41431-020-0612-1), 2020-03-20

## Supplementary information for the study of *BRCA1* c.5407-25T>A

**Supplementary Table S1**

| Primer                              | Sequence 5`-3`            |
|-------------------------------------|---------------------------|
| <i>BRCA1</i> kozakwtc1F             | GAAATGGATTTATCTGCTCTTCGCG |
| <i>BRCA1</i> wtc5589*               | GTAGTGGCTGTGGGGGATCTG     |
| <i>BRCA1</i> c5407-25               | CCACAGGTGCCTCACACATCTG    |
| <i>BRCA1</i> c5069rnaF2 (exon17-18) | AAACAGATGCTGAGTTTGTGTG    |
| <i>BRCA1</i> c5592*158rnaR2 (UTR)   | AGCAGAAAATCTTTAAGGGACC    |
| <i>BRCA1</i> c4753F (exon 16)       | CCAGAGTCAGCTCGTGTGG       |
| <i>BRCA1</i> c5441R (exon 23)       | GCATCTGGCTGCACAACCAC      |

Primers for PCR amplification.

\*Stop codon excluded to allow read through to C-terminal V5 tag provided by vector.

**Supplementary Table S2**

| Individual             | Family | Cancer diagnosis          | Tissue | Allele A (%) | Allele G (%) |
|------------------------|--------|---------------------------|--------|--------------|--------------|
| c.5407-25T>A carrier 1 | 2      | Unaffected                | Blood  | 12%          | 88%          |
|                        |        |                           | Blood  | 12%          | 88%          |
|                        |        |                           | Breast | 20%          | 80%          |
| c.5407-25T>A carrier 2 | 7      | Breast cancer 60-65 years | Blood  | 13%          | 87%          |
| c.5407-25T>A carrier 3 | 7      | Unaffected                | Blood  | 10%          | 90%          |
| Normal control         |        | Unaffected                | Blood  | 53%          | 47%          |

Semi-quantitative analysis of the amount of full-length *BRCA1* transcript including exon 23 expressed from the variant allele: A region including the SNP rs1799966 (c.4837A>G) in exon 16 was amplified by selective PCR using a reverse primer located within exon 23 and cDNA from three carriers of *BRCA1* c.5407-25T>A, and one normal control. The PCR products were sequenced by NGS technology. The table shows the relative contribution of the variant allele and the wild type allele to total full-length *BRCA1* transcript. The samples had a coverage of approximately 100,000x.

**Supplementary Figure S1:**  
**Expression of BRCA1 wild-type and p.Gly1803GlnfsTer11.**  
HeLa cells were transiently transfected with the empty vector pcDNA3.1 V5 and plasmids encoding BRCA1 wild-type and BRCA1 p.(Gly1803GlnfsTer11) including V5 tag . After 48 hours, cells were lysed and Western blot analysis was performed using A) anti V5, and B) anti-Actin.

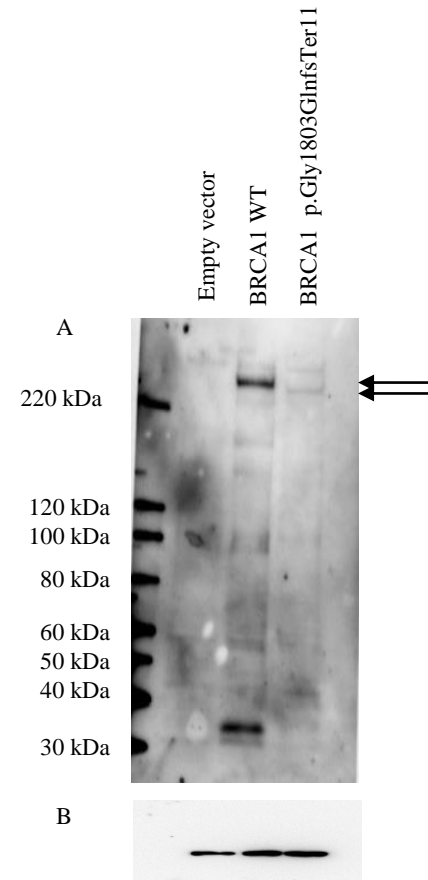

Supplement: 41431_2020_612_MOESM1_ESM.pdf [file 41431_2020_612_MOESM1_ESM.pdf]
